# Supplementary material for: The association between constipation and stroke based on the NHANES and Mendelian randomization study
Source: Front Neurosci. 2023 Nov 7;17:1276032. doi: 10.3389/fnins.2023.1276032 (PMC10661951; doi:10.3389/fnins.2023.1276032)
Supplement: Supplementary file 10 [file Table_1.XLSX]

## Sheet: S1
Additional file 1: Table S1: Characteristics of the Instrumental SNPs associated with constipation.
SNP	nearest_genes	Chr:pos	effect_allele	other_allele	eaf	beta	se	P_value	R2	F statistic
rs35839493	FOXN2	2:48593077	C	A	0.127342	-0.0725421	0.0132622	4.50433e-08	8.73483e-05	29.9191
rs113117433	ARL4C	2:235225025	T	C	0.0195584	0.147987	0.0306824	1.41283e-06	6.79176e-05	23.2631
rs114099507	SPEF2	5:35627026	T	C	0.0212642	0.136548	0.029265	3.07277e-06	6.35608e-05	21.7708
rs9686527	PDE8B	5:76623830	C	T	0.000657284	0.0484814	0.0102159	2.07793e-06	6.57524e-05	22.5215
rs35347218	RPL7L1P4	5:113087447	A	T	0.229992	-0.0490803	0.0104519	2.6554e-06	6.43783e-05	22.0508
rs75439231	RP11-207F8.1	6:83196662	T	C	0.0148984	0.159666	0.0348357	4.57488e-06	6.13327e-05	21.0076
rs7745923	RP11-307P5.1	6:148080434	C	T	0.867768	-0.0597691	0.0127742	2.88456e-06	6.39148e-05	21.892
rs1983785	TIAM2	6:155248596	A	C	0.792933	0.0598795	0.0110388	5.81233e-08	8.5905e-05	29.4247
rs3816260	TOR1B	9:132565361	C	T	0.0904521	-0.0707476	0.015417	4.45543e-06	6.14809e-05	21.0583
rs112073135	OR10AG1	11:55737981	C	G	0.0353152	-0.120691	0.0244628	8.07012e-07	7.1064e-05	24.3409
rs146437037	RNU6-600P	12:49273215	T	C	0.140278	-0.0586149	0.0126751	3.7569e-06	6.24352e-05	21.3852
rs7989659	LINC00540	13:22619575	A	G	0.915702	-0.0741618	0.0160989	4.09251e-06	6.19562e-05	21.2211
rs185003380	CYFIP1	15:22945351	T	A	0.174427	-0.061644	0.012086	3.3886e-07	7.59498e-05	26.0146
rs4474684	LMF1	16:951045	T	C	0.260899	0.0463862	0.00987778	2.65283e-06	6.43834e-05	22.0526
rs9931348	CTD-2336H13.2	16:76882283	T	C	0.196116	-0.0562388	0.011073	3.79568e-07	7.53099e-05	25.7954
rs1916295	Metazoa_SRP	17:47190299	T	C	0.191659	-0.0516031	0.0112275	4.30427e-06	6.1674e-05	21.1245
rs1629038	CFD	19:860852	C	G	0.659662	-0.0421569	0.00922245	4.85121e-06	6.10044e-05	20.8951
rs113664674	TRPM4	19:49674722	A	G	0.0138205	0.181511	0.0357881	3.94031e-07	7.50999e-05	25.7234

## Sheet: S2
Additional file 1: Table S2. Instrument variables of stroke
SNP	effect_allele	other_allele	eaf	beta	se	P_value
rs35839493	C	A	0.127342	-0.0725421	0.0132622	4.50433e-08
rs113117433	T	C	0.0195584	0.147987	0.0306824	1.41283e-06
rs114099507	T	C	0.0212642	0.136548	0.029265	3.07277e-06
rs9686527	C	T	0.000657284	0.0484814	0.0102159	2.07793e-06
rs35347218	A	T	0.229992	-0.0490803	0.0104519	2.6554e-06
rs75439231	T	C	0.0148984	0.159666	0.0348357	4.57488e-06
rs7745923	C	T	0.867768	-0.0597691	0.0127742	2.88456e-06
rs1983785	A	C	0.792933	0.0598795	0.0110388	5.81233e-08
rs3816260	C	T	0.0904521	-0.0707476	0.015417	4.45543e-06
rs112073135	C	G	0.0353152	-0.120691	0.0244628	8.07012e-07
rs146437037	T	C	0.140278	-0.0586149	0.0126751	3.7569e-06
rs7989659	A	G	0.915702	-0.0741618	0.0160989	4.09251e-06
rs185003380	T	A	0.174427	-0.061644	0.012086	3.3886e-07
rs4474684	T	C	0.260899	0.0463862	0.00987778	2.65283e-06
rs9931348	T	C	0.196116	-0.0562388	0.011073	3.79568e-07

## Sheet: S3
Additional file 1: Table S3. Instrument variables of ischemic stroke
SNP	effect_allele	other_allele	eaf	beta	se	P_value
rs35839493	C	A	0.127342	-0.0725421	0.0132622	4.50433e-08
rs114099507	T	C	0.0212642	0.136548	0.029265	3.07277e-06
rs9686527	C	T	0.000657284	0.0484814	0.0102159	2.07793e-06
rs35347218	A	T	0.229992	-0.0490803	0.0104519	2.6554e-06
rs75439231	T	C	0.0148984	0.159666	0.0348357	4.57488e-06
rs7745923	C	T	0.867768	-0.0597691	0.0127742	2.88456e-06
rs1983785	A	C	0.792933	0.0598795	0.0110388	5.81233e-08
rs3816260	C	T	0.0904521	-0.0707476	0.015417	4.45543e-06
rs112073135	C	G	0.0353152	-0.120691	0.0244628	8.07012e-07
rs146437037	T	C	0.140278	-0.0586149	0.0126751	3.7569e-06
rs7989659	A	G	0.915702	-0.0741618	0.0160989	4.09251e-06
rs185003380	T	A	0.174427	-0.061644	0.012086	3.3886e-07
rs4474684	T	C	0.260899	0.0463862	0.00987778	2.65283e-06
rs9931348	T	C	0.196116	-0.0562388	0.011073	3.79568e-07

## Sheet: S4
Additional file 1: Table S4. Instrument variables of lacunar stroke
SNP	effect_allele	other_allele	eaf	beta	se	P_value
rs35839493	C	A	0.127342	-0.0725421	0.0132622	4.50433e-08
rs113117433	T	C	0.0195584	0.147987	0.0306824	1.41283e-06
rs114099507	T	C	0.0212642	0.136548	0.029265	3.07277e-06
rs9686527	C	T	0.000657284	0.0484814	0.0102159	2.07793e-06
rs75439231	T	C	0.0148984	0.159666	0.0348357	4.57488e-06
rs7745923	C	T	0.867768	-0.0597691	0.0127742	2.88456e-06
rs1983785	A	C	0.792933	0.0598795	0.0110388	5.81233e-08
rs3816260	C	T	0.0904521	-0.0707476	0.015417	4.45543e-06
rs146437037	T	C	0.140278	-0.0586149	0.0126751	3.7569e-06
rs4474684	T	C	0.260899	0.0463862	0.00987778	2.65283e-06
rs9931348	T	C	0.196116	-0.0562388	0.011073	3.79568e-07

## Sheet: S5
Additional file 1: Table S5. Instrument variables of small-vessel stroke
SNP	effect_allele	other_allele	eaf	beta	se	P_value
rs35839493	C	A	0.127342	-0.0725421	0.0132622	4.50433e-08
rs114099507	T	C	0.0212642	0.136548	0.029265	3.07277e-06
rs9686527	C	T	0.000657284	0.0484814	0.0102159	2.07793e-06
rs35347218	A	T	0.229992	-0.0490803	0.0104519	2.6554e-06
rs75439231	T	C	0.0148984	0.159666	0.0348357	4.57488e-06
rs7745923	C	T	0.867768	-0.0597691	0.0127742	2.88456e-06
rs1983785	A	C	0.792933	0.0598795	0.0110388	5.81233e-08
rs3816260	C	T	0.0904521	-0.0707476	0.015417	4.45543e-06
rs112073135	C	G	0.0353152	-0.120691	0.0244628	8.07012e-07
rs146437037	T	C	0.140278	-0.0586149	0.0126751	3.7569e-06
rs7989659	A	G	0.915702	-0.0741618	0.0160989	4.09251e-06
rs185003380	T	A	0.174427	-0.061644	0.012086	3.3886e-07
rs4474684	T	C	0.260899	0.0463862	0.00987778	2.65283e-06
rs9931348	T	C	0.196116	-0.0562388	0.011073	3.79568e-07
rs113664674	A	G	0.0138205	0.181511	0.0357881	3.94031e-07

## Sheet: S6
Additional file 1: Table S6. Instrument variables of large-artery atherosclerotic stroke
SNP	effect_allele	other_allele	eaf	beta	se	P_value
rs35839493	C	A	0.127342	-0.0725421	0.0132622	4.50433e-08
rs114099507	T	C	0.0212642	0.136548	0.029265	3.07277e-06
rs9686527	C	T	0.000657284	0.0484814	0.0102159	2.07793e-06
rs35347218	A	T	0.229992	-0.0490803	0.0104519	2.6554e-06
rs75439231	T	C	0.0148984	0.159666	0.0348357	4.57488e-06
rs7745923	C	T	0.867768	-0.0597691	0.0127742	2.88456e-06
rs1983785	A	C	0.792933	0.0598795	0.0110388	5.81233e-08
rs3816260	C	T	0.0904521	-0.0707476	0.015417	4.45543e-06
rs112073135	C	G	0.0353152	-0.120691	0.0244628	8.07012e-07
rs146437037	T	C	0.140278	-0.0586149	0.0126751	3.7569e-06
rs7989659	A	G	0.915702	-0.0741618	0.0160989	4.09251e-06
rs185003380	T	A	0.174427	-0.061644	0.012086	3.3886e-07
rs4474684	T	C	0.260899	0.0463862	0.00987778	2.65283e-06
rs9931348	T	C	0.196116	-0.0562388	0.011073	3.79568e-07
rs113664674	A	G	0.0138205	0.181511	0.0357881	3.94031e-07

## Sheet: S7
Additional file 1: Table S7. Instrument variables of cardioembolic stroke
SNP	effect_allele	other_allele	eaf	beta	se	P_value
rs35839493	C	A	0.127342	-0.0725421	0.0132622	4.50433e-08
rs114099507	T	C	0.0212642	0.136548	0.029265	3.07277e-06
rs9686527	C	T	0.000657284	0.0484814	0.0102159	2.07793e-06
rs35347218	A	T	0.229992	-0.0490803	0.0104519	2.6554e-06
rs75439231	T	C	0.0148984	0.159666	0.0348357	4.57488e-06
rs7745923	C	T	0.867768	-0.0597691	0.0127742	2.88456e-06
rs1983785	A	C	0.792933	0.0598795	0.0110388	5.81233e-08
rs3816260	C	T	0.0904521	-0.0707476	0.015417	4.45543e-06
rs112073135	C	G	0.0353152	-0.120691	0.0244628	8.07012e-07
rs146437037	T	C	0.140278	-0.0586149	0.0126751	3.7569e-06
rs7989659	A	G	0.915702	-0.0741618	0.0160989	4.09251e-06
rs185003380	T	A	0.174427	-0.061644	0.012086	3.3886e-07
rs4474684	T	C	0.260899	0.0463862	0.00987778	2.65283e-06
rs9931348	T	C	0.196116	-0.0562388	0.011073	3.79568e-07
