# Supplementary material for: The association between constipation and stroke based on the NHANES and Mendelian randomization study
Source: Front Neurosci. 2023 Nov 7;17:1276032. doi: 10.3389/fnins.2023.1276032 (PMC10661951; doi:10.3389/fnins.2023.1276032)
Supplement: Supplementary file 11 [file Table_2.XLSX]

## Sheet: S8
Additional file 2: Table S1: Characteristics of the instrument snps associated with stroke.
SNP	nearest_genes	Chr:pos	effect_allele	other_allele	eaf	beta	se	P_value	R2	F statistic
rs10774624	RP3-473L9.4	12:111833788	A	G	0.5285	-0.0654	0.0094	4.04203e-12	0.000108353416725104	48.4060660932549
rs11242678	RP11-157J24.2	6:1337180	T	C	0.2551	0.0643	0.0105	8.70803e-10	8.39453743385863e-05	37.5010430839002
rs1537375	CDKN2B-AS1	9:22116071	C	T	0.5021	0.0519	0.0091	1.24099e-08	7.28132118347116e-05	32.5275932858351
rs2107595	HDAC9	7:19049388	A	G	0.1671	0.0803	0.0121	3.58592e-11	9.85842221622549e-05	44.0413223140496
rs2634074	RP11-119H12.3	4:111677041	A	T	0.7885	-0.084	0.0112	6.55843e-14	0.000125909274812941	56.25
rs475937	WTAPP1	11:102687700	C	A	0.8682	-0.0757	0.0137	2.91602e-08	6.83456412284317e-05	30.5316745697693
rs4942561	LRCH1	13:47209347	T	G	0.7581	0.064	0.0107	2.048e-09	8.00843199358212e-05	35.7760503100708

## Sheet: S9
Additional file 2: Table S2: Characteristics of instrument snPs associated to ischaemic stroke.
SNP	nearest_genes	Chr:pos	effect_allele	other_allele	eaf	beta	se	P_value	R2	F statistic
rs11242678	RP11-157J24.2	6:1337180	T	C	0.255	0.0723	0.0114	2.70302e-10	9.13382932936429e-05	40.2222991689751
rs2066864	FGG	4:155525695	A	G	0.2452	0.0634	0.0115	3.51399e-08	6.90205679571961e-05	30.3936483931947
rs2107595	HDAC9	7:19049388	A	G	0.1673	0.0882	0.0132	2.32809e-11	0.000101384355542384	44.646694214876
rs2634074	HDAC9	7:19049388	A	T	0.7877	-0.0941	0.0121	5.90473e-15	0.000137332880450077	60.4795437470118
rs3184504	SH2B3	12:111884608	C	T	0.5278	-0.0779	0.0101	1.22914e-14	0.000135082524426898	59.4883834918145
rs473238	WTAPP1	11:102700360	C	T	0.8674	-0.0831	0.0147	1.65101e-08	7.25707363577521e-05	31.9571012078301
rs4942561	LRCH1	13:47209347	T	G	0.759	0.0655	0.0116	1.77101e-08	7.24037142621235e-05	31.8835463733651

## Sheet: S10
Additional file 2: Table S3: Characteristics of the instrument snPs associated with lacunar stroke.
SNP	nearest_genes	Chr:pos	effect_allele	other_allele	eaf	beta	se	P_value	R2	F statistic
rs12445022	RP11-482M8.1	16:87575332	A	G	0.3171	0.1212	0.0217	2.47799e-08	0.000122339217167913	31.1950561702308
rs2293576	SLC39A13	11:47434986	A	G	0.3111	-0.1351	0.0219	7.21805e-10	0.000149241879004864	38.0559412856279
rs72934535	NBEAL1	2:203968973	C	T	0.1133	-0.22	0.0373	3.71903e-09	0.000136427369061249	34.7878587497934

## Sheet: S11
Additional file 2: Table S4: Characteristics of the instrument snPs associated with cardiogenic stroke.
SNP	nearest_genes	Chr:pos	effect_allele	other_allele	eaf	beta	se	P_value	R2	F statistic
rs10075233	CTD-2232E5.2	5:85403909	A	G	0.1207	0.1412	0.0296	1.88599e-06	5.50547194423024e-05	22.7554784514244
rs11076151	GNAO1	16:56324433	A	C	0.1617	0.1282	0.0259	7.38907e-07	5.92765980537244e-05	24.5005888403572
rs11085904	ADGRE3	19:14781712	T	A	0.0156	0.5316	0.1145	3.43202e-06	5.21517413967216e-05	21.5555431818615
rs11216451	DSCAML1	11:117424454	G	A	0.0847	0.155	0.0339	4.80596e-06	5.05794993323814e-05	20.9056656311727
rs114279112	ELOBP3	2:49022205	G	T	0.0191	0.4327	0.0816	1.13501e-07	6.80293654777091e-05	28.1185857002114
rs11596328	SH3PXD2A	10:105493177	T	G	0.1193	0.1382	0.0296	3.039e-06	5.27402582056081e-05	21.798803871439
rs11772660	RP11-598O8.1	7:53086412	G	A	0.3928	0.0916	0.0198	3.57001e-06	5.17810164335075e-05	21.4023058871544
rs12874361	SLITRK1	13:84381978	T	A	0.0147	0.4982	0.1006	7.43207e-07	5.93359920794947e-05	24.5251394219178
rs12932445	ZFHX3	16:73069888	C	T	0.1805	0.1758	0.0245	6.88018e-13	0.000124561539191657	51.4879466888796
rs13063705	ROBO2	3:77508835	T	A	0.5143	-0.0967	0.0211	4.82603e-06	5.08157641965548e-05	21.0033242739381
rs146390073	RGS7	1:241306248	T	C	0.0215	0.6688	0.1195	2.19902e-08	7.57802963318907e-05	31.3225216645367
rs150601746	RP5-827O9.1	1:90960525	T	G	0.0112	0.6427	0.1379	3.145e-06	5.25530270618354e-05	21.721412716701
rs1549758	NOS3	7:150695726	C	T	0.6868	-0.1016	0.0216	2.61102e-06	5.35290035185206e-05	22.1248285322359
rs1994236	C5orf47	5:173401343	G	A	0.4474	0.0935	0.0198	2.23398e-06	5.39512986518157e-05	22.2993827160494
rs2392477	ELMO1	7:36985541	C	T	0.3535	-0.0935	0.0201	3.17001e-06	5.23529143655236e-05	21.6386970619539
rs2466455	RP11-119H12.3	4:111685615	T	C	0.7826	-0.2992	0.0222	2.75169e-41	0.000439297666292115	181.642399155913
rs4868241	HMP19	5:172632400	T	C	0.5895	-0.1048	0.0197	1.04501e-07	6.84688241310367e-05	28.3002396351362
rs528684	LINC02098	11:128124091	A	C	0.9571	-0.228	0.0499	4.86598e-06	5.05102082433744e-05	20.8770245902627
rs60229978	NRG1	8:32122294	C	G	0.0198	0.4597	0.0929	7.47601e-07	5.92412677459413e-05	24.4859850227278
rs616154	ABO	9:136150466	T	C	0.5112	0.1035	0.0193	7.98197e-08	6.95774257542807e-05	28.7584901608097
rs6536024	LRAT	4:155543369	C	T	0.53	0.1023	0.0195	1.461e-07	6.65864127867613e-05	27.5221301775148
rs6561050	RP11-413N19.2	13:43030030	G	C	0.7475	-0.1206	0.0247	1.00099e-06	5.7677729028836e-05	23.8396957825895
rs66694617	FHDC1	4:149521809	T	C	0.0546	0.2145	0.0457	2.64503e-06	5.33005312004959e-05	22.030390377737
rs67711332	HK1	10:71109317	A	G	0.051	0.2159	0.0448	1.45801e-06	5.61897818759672e-05	23.2246542171556
rs6838973	RP11-119H12.3	4:111765495	T	C	0.4341	-0.1079	0.0196	3.58402e-08	7.33215091803478e-05	30.3061484798001
rs7149383	RP11-991C1.2	14:95505749	A	G	0.0226	0.3135	0.0687	4.976e-06	5.0381631645206e-05	20.823878263191
rs7156318	BRMS1L	14:36308059	G	C	0.1463	0.1397	0.0296	2.31398e-06	5.38912774003673e-05	22.2745731373265
rs72700114	LINC01681	1:170193825	C	G	0.0754	0.1836	0.0371	7.67202e-07	5.92521746083371e-05	24.4904933849652
rs730185	TRIO	5:14360323	C	T	0.0389	0.2482	0.0523	2.04202e-06	5.44890209692525e-05	22.5216485272128
rs73121964	RP11-272B17.1	12:59799093	G	A	0.0224	0.3668	0.0794	3.85398e-06	5.16330426128912e-05	21.3411416860712
rs7514452	IL6R	1:154438084	T	C	0.8051	-0.1161	0.0236	8.77809e-07	5.85527769275825e-05	24.2013968687159
rs755772	PRELID2	5:141101086	C	T	0.2705	-0.1076	0.0224	1.575e-06	5.58260311415934e-05	23.0742984693878
rs7628785	CCK	3:42295139	A	G	0.2731	-0.1023	0.022	3.33503e-06	5.23137290562191e-05	21.6225
rs7767246	CDKN1A	6:36659215	G	C	0.1909	-0.126	0.0256	8.56801e-07	5.86095245328563e-05	24.224853515625
rs78893982	PTCH1	9:98308002	G	T	0.0711	0.1902	0.0405	2.63403e-06	5.33605499732958e-05	22.0551989026063
rs9360935	SENP6	6:76408297	C	A	0.265	0.1111	0.0215	2.31201e-07	6.46034384320787e-05	26.7024553812872

## Sheet: S12
Additional file 2: Table S5: Characteristics of the instrument snPs associated with small vascular stroke.
SNP	nearest_genes	Chr:pos	effect_allele	other_allele	eaf	beta	se	P_value	R2	F statistic
rs113358410	RP11-6N13.1	5:103872028	C	T	0.0262	0.3961	0.0811	1.05599e-06	0.00012043413399834	23.8543713823947
rs114646421	UCK2	1:165805832	C	T	0.0132	0.6324	0.132	1.67402e-06	0.000115882926585585	22.9528099173554
rs115526507	LINC01593	2:108686292	C	T	0.0216	0.4388	0.0886	7.322e-07	0.000123835720211644	24.5282065131542
rs11597695	SH3PXD2A	10:105460069	T	C	0.3247	0.1175	0.0254	3.81496e-06	0.000108042667943335	21.3997302994606
rs116540868	KCNH8	3:19277875	A	G	0.0168	0.4811	0.1018	2.31499e-06	0.000112761308847118	22.3344446331456
rs11657359	RNA5SP446	17:64889732	A	C	0.0881	-0.2139	0.0465	4.14295e-06	0.000106832450164883	21.16
rs11666659	CTD-2192J16.17	19:12657648	G	C	0.6111	-0.1143	0.0247	3.77703e-06	0.000108114892988704	21.4140372731892
rs117845238	CTD-2547G23.4	16:25336672	G	T	0.0118	0.6349	0.1341	2.20201e-06	0.00011317170805662	22.4157409214689
rs12157917	MYO18B	22:26433054	T	C	0.0183	0.4549	0.0934	1.11699e-06	0.000119762273205752	23.7212800737314
rs12445022	RP11-482M8.1	16:87575332	A	G	0.3367	0.1301	0.0244	9.25806e-08	0.000143531269431212	28.4298743617307
rs139543823	RPL26P3	14:28978275	G	C	0.0177	0.4526	0.096	2.391e-06	0.000112220401577717	22.2272960069444
rs142159163	PKN2	1:89281025	T	C	0.0303	0.4345	0.0873	6.52199e-07	0.00012506352952666	24.7714297710755
rs149163995	CARF	2:203777226	T	C	0.1256	-0.1945	0.0368	1.21899e-07	0.000141031539014678	27.9346718454631
rs1500894	C8orf37-AS1	8:96485378	C	T	0.0448	0.2533	0.0553	4.59304e-06	0.000105927332445566	20.9807069118306
rs17103516	RALGAPA1	14:36232026	A	G	0.0716	0.2189	0.0469	3.09001e-06	0.000109984628983373	21.7844117820887
rs182734612	NLRP13	19:56411074	G	A	0.0519	0.2802	0.0587	1.83599e-06	0.000115038714650421	22.7855785053211
rs35818742	ADRB1	10:115793989	C	T	0.1344	0.1674	0.0329	3.64897e-07	0.000130706223717464	25.8892286656627
rs4812082		20:57981301	C	T	0.8099	-0.1406	0.0298	2.30102e-06	0.000112388849477641	22.260663934057
rs61081897	AC079756.1	7:9636913	T	C	0.2149	0.1368	0.0281	1.07701e-06	0.000119657936681818	23.7006116943808
rs6845977	snoU13	4:27791323	C	T	0.3273	0.1213	0.0242	5.40095e-07	0.000126843934125785	25.1241206201762
rs7088080	RP11-482E14.1	10:3523623	A	C	0.6595	0.1251	0.0252	6.78203e-07	0.000124420924468527	24.6441326530612
rs72812543	RP11-461O7.1	16:56085766	T	C	0.094	0.1965	0.0419	2.75899e-06	0.000111040845798322	21.993637539089
rs72909430	WT1	11:32433162	A	C	0.042	0.3018	0.0639	2.28602e-06	0.000112621618828528	22.3067733474399
rs72973980	RP11-94P11.4	11:105073466	T	C	0.0768	0.2224	0.0484	4.31499e-06	0.00010660227376578	21.1144047537737
rs74506932	RTEL1	20:62325297	T	C	0.0134	0.6051	0.1312	3.983e-06	0.000107392491492592	21.2709377091389
rs75317695	TGFBR3	1:92263757	C	A	0.0129	0.6522	0.1404	3.39899e-06	0.000108946675067171	21.578804149317
rs75501811	1:218001617	1:218001617	G	A	0.0214	0.3704	0.079	2.77703e-06	0.000110987353138886	21.9830411792982
rs76576182	DLX5	7:96656620	G	A	0.0212	0.4436	0.0844	1.456e-07	0.000139467023555929	27.6247388872667
rs7669847	NELFA	4:2037262	C	T	0.0248	0.4975	0.1035	1.54099e-06	0.000116651071258051	23.1049732782562
rs77645453	SEC63P2	4:35260512	G	A	0.0303	0.3557	0.0762	3.06803e-06	0.000110012980736888	21.7900279689448
rs7766042	RP11-157J24.2	6:1366718	C	T	0.1016	0.2129	0.0397	7.96508e-08	0.000145191493855974	28.7587701209956
rs9515201	COL4A2	13:111040798	C	A	0.6937	-0.1195	0.0247	1.34199e-06	0.000118174698553966	23.4067924404596

## Sheet: S13
Additional file 2: Table S6: Characteristics of the instrument snPs associated with macrovascular stroke.
SNP	nearest_genes	Chr:pos	effect_allele	other_allele	eaf	beta	se	P_value	R2	F statistic
rs10820405	LINC01492	9:106010237	A	G	0.1847	-0.1812	0.0331	4.50796e-08	7.30019693245649e-05	29.968182108597
rs114667237	PLXNA2	1:208284777	A	G	0.0195	0.4516	0.0925	1.046e-06	5.80637479810431e-05	23.8355073776479
rs117075771	RP11-563J2.3	10:6385623	A	G	0.0157	0.9169	0.1946	2.47201e-06	5.40804962906637e-05	22.2002708800512
rs117270164	19:57086001	19:57086001	G	A	0.0152	0.5915	0.1234	1.65402e-06	5.59707017975964e-05	22.9762516122084
rs12124533	LINC01765	1:115657799	T	C	0.2499	0.1499	0.0278	6.73194e-08	7.08253608722811e-05	29.0745950002588
rs12130936	SGIP1	1:67052061	C	T	0.0272	0.4477	0.0882	3.82296e-07	6.27647266287353e-05	25.7654076747857
rs137865305	TKT	3:49475846	A	G	0.0346	0.5381	0.1056	3.46601e-07	6.32523345069398e-05	25.9655871570822
rs142395500	TRAPPC8	18:29513972	A	G	0.0241	0.4295	0.0869	7.60904e-07	5.95068308236064e-05	24.4279365592238
rs142532801	PLPP4	10:122209942	T	C	0.0273	0.3658	0.0798	4.54601e-06	5.1187659318014e-05	21.0126883625103
rs150188940	FHIT	3:60663256	G	A	0.0195	0.4659	0.0994	2.733e-06	5.3517435150191e-05	21.9691195462513
rs150849782	RP1-130G2.1	6:19222459	C	G	0.0137	0.6812	0.1436	2.11198e-06	5.48179099767638e-05	22.5029988904493
rs150994262	CACNA1S	1:201063933	A	G	0.012	0.766	0.1609	1.93602e-06	5.52112213944543e-05	22.6644639131733
rs151166754	SMUG1P1	18:47195385	T	C	0.0235	0.4759	0.0985	1.34999e-06	5.68643572189202e-05	23.3431224715916
rs17612742	EDNRA	4:148414651	C	T	0.1378	0.1764	0.0361	1.05201e-06	5.81652204633675e-05	23.8771648468014
rs198759	SYT7	11:61352358	G	A	0.0228	0.451	0.0918	8.96603e-07	5.87960388418883e-05	24.1361347250108
rs2107595	HDAC9	7:19049388	A	G	0.1677	0.2358	0.0319	1.44212e-13	0.000133092723576438	54.6394394709171
rs2117291	CTNNA2	2:80186252	C	T	0.907	-0.1895	0.0415	4.95496e-06	5.07932565168095e-05	20.8507766003774
rs2487486	ITGA8	10:15768407	T	G	0.9885	-0.6198	0.133	3.16199e-06	5.29033005717986e-05	21.7170015263723
rs2602482	GDPD4	11:77013928	A	G	0.0128	0.6177	0.1301	2.04202e-06	5.49139447464552e-05	22.5424237608273
rs4304924	AL139319.1	13:79238925	A	G	0.5689	0.1158	0.0251	3.94703e-06	5.18505108021386e-05	21.2848050030952
rs476762	MMP3	11:102710707	A	T	0.133	0.201	0.0353	1.222e-08	7.89794826665162e-05	32.4222166938183
rs56393506	LPA	6:161089307	T	C	0.1639	0.1878	0.0355	1.256e-07	6.81727391367826e-05	27.9855901606824
rs57848797	ZNF618	9:116627146	C	T	0.0151	0.5861	0.1227	1.793e-06	5.5582241889289e-05	22.8167780228743
rs60928814	OPCML	11:133241305	G	A	0.2188	-0.1601	0.0345	3.44302e-06	5.24599137672604e-05	21.5349800462088
rs66824660	VRTN	14:74796236	A	C	0.0298	0.3734	0.0814	4.49304e-06	5.1260570700927e-05	21.0426202391804
rs71486349	GRIK4	11:120808303	T	G	0.0208	0.4222	0.0905	3.07298e-06	5.3017855347829e-05	21.7640291810384
rs72845421	AC079154.1	2:124763852	T	C	0.026	0.4032	0.0873	3.82604e-06	5.19631983137503e-05	21.3310660006377
rs73175633	PQLC3	2:11294849	C	G	0.0174	0.4777	0.1034	3.82103e-06	5.1993937298453e-05	21.343685112369
rs7610618	SIAH2	3:149157706	T	C	0.013	0.8449	0.149	1.43701e-08	7.83267212746369e-05	32.1542277374893
rs76263261	RP11-17E3.1	18:67009785	C	T	0.0258	0.4149	0.0894	3.42997e-06	5.24680504193911e-05	21.5383203459304
rs7647426	ALCAM	3:105084990	G	C	0.0396	0.3401	0.0657	2.29198e-07	6.5276980432069e-05	26.7967746942539
rs78223716	LINC01080	13:80559244	G	A	0.023	0.4367	0.0937	3.16898e-06	5.29139403678364e-05	21.7213694333171
rs79651785	RIMBP2	12:131007519	A	G	0.0148	0.6238	0.1336	2.99999e-06	5.3108085006278e-05	21.8010707626663
rs79680958	RP11-404I7.1	4:129601328	A	G	0.0754	0.2475	0.0503	8.60201e-07	5.89786332169839e-05	24.211095257481
